# Supplementary material
Source: PubMed Central journal article supplement (PMC4913506)
Supplement: Supp_Fig1.pdf [file Supp_Fig1.pdf]

## Supplementary Data

| Treatment                                                                                              | # Vertebrae | HA (mL) | $\beta$ -TCP (mg) | Total Dose rhNELL-1 (mg) | Concentration rhNELL-1 (mg/mL) |
|--------------------------------------------------------------------------------------------------------|-------------|---------|-------------------|--------------------------|--------------------------------|
| Control               | 6           | 1.5     | 150               | 0                        | 0                              |
| rhNELL-1 (low dose)   | 3           | 1.5     | 150               | 0.9                      | 0.6                            |
| rhNELL-1 (high dose)  | 3           | 1.5     | 150               | 2.25                     | 1.5                            |

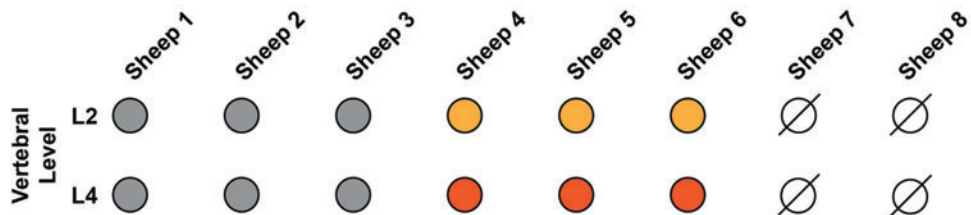

**SUPPLEMENTARY FIG. S1.** rhNELL-1 implant material contents and bi-level sheep vertebral implantation surgery. Surgery was performed 4 months post-OVX on  $n=6$  osteoporotic sheep that were most responsive to osteoporosis induction as confirmed by DXA. The table shows rhNELL-1 implant material contents of sheep implant. The schematic illustrates a bi-level surgery of sheep vertebrae. 0.09 mg of rhNELL-1 was implanted in L2, and 2.25 mg of rhNELL-1 was implanted in L4 of  $n=3$  randomly selected sheep. Control vehicles were implanted in L2 and L4 vertebrae of  $n=3$  remaining sheep. L2 and L4 of sheep vertebrae are anatomically similar to human vertebrae as previously shown. Additionally, L2 and L4 are anatomically similar to each other.  $\beta$ -TCP,  $\beta$ -tricalcium phosphate; DXA, dual-energy X-ray absorptiometry; HA, hyaluronic acid; rhNELL-1, recombinant human NELL-1.
