# Supplementary material
Source: PubMed Central journal article supplement (PMC4913506)
Supplement: Supp_Fig2.pdf [file Supp_Fig2.pdf]

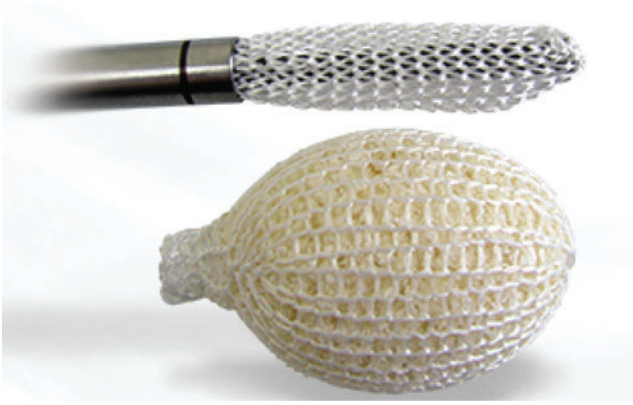

**SUPPLEMENTARY FIG. S2.** Illustrative photograph of the OptiMesh implant sac, reproduced with permission from Spineology.
